# Supplementary material for: A Screen Using iPSC-Derived Hepatocytes Reveals NAD+ as a Potential Treatment for mtDNA Depletion Syndrome
Source: PubMed Central journal article supplement (PMC6289059; doi:10.1016/j.celrep.2018.10.036), 2018-11-06
Supplement: NIHMS1512154-supplement-1.pdf [file NIHMS1512154-supplement-1.pdf]

**Cell Reports, Volume 25**

**Supplemental Information**

**A Screen Using iPSC-Derived Hepatocytes**

**Reveals NAD<sup>+</sup> as a Potential Treatment**

**for mtDNA Depletion Syndrome**

**Ran Jing, James L. Corbett, Jun Cai, Gyda C. Beeson, Craig C. Beeson, Sherine S. Chan, David P. Dimmock, Lynn Lazcares, Aron M. Geurts, John J. Lemasters, and Stephen A. Duncan**

A.

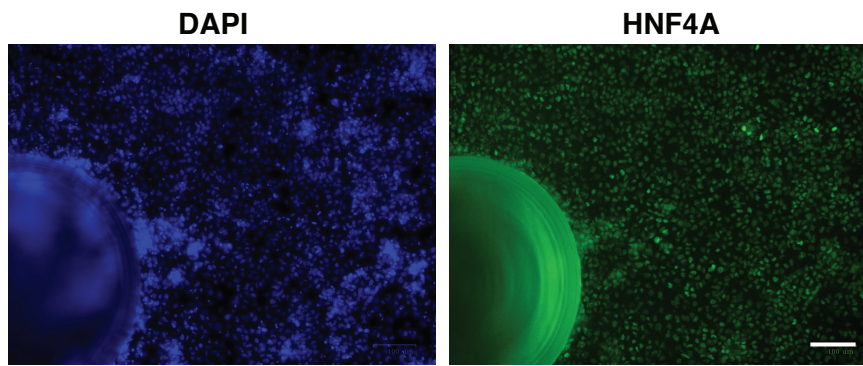

B.

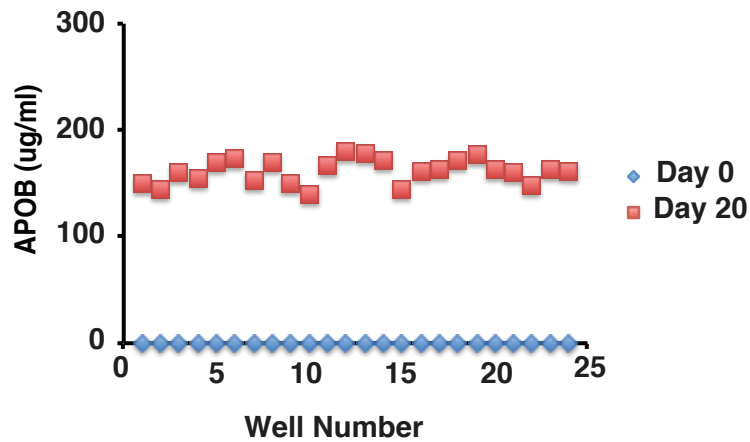

**Fig. S1. Related to Figure 1. Expression of hepatocyte markers during the differentiation of iPCs in 96-well Seahorse plates.** A) Immunostaining to detect HNF4a after 20 days of differentiation of iPCs. Cells were counterstained with DAPI to identify nuclei. Scale bar = 100 $\mu$ M. B) Levels of APOB were measured in the medium of iPCs (blue) or in iPC-derived hepatocytes (day20; red) using ELISA on individual wells.

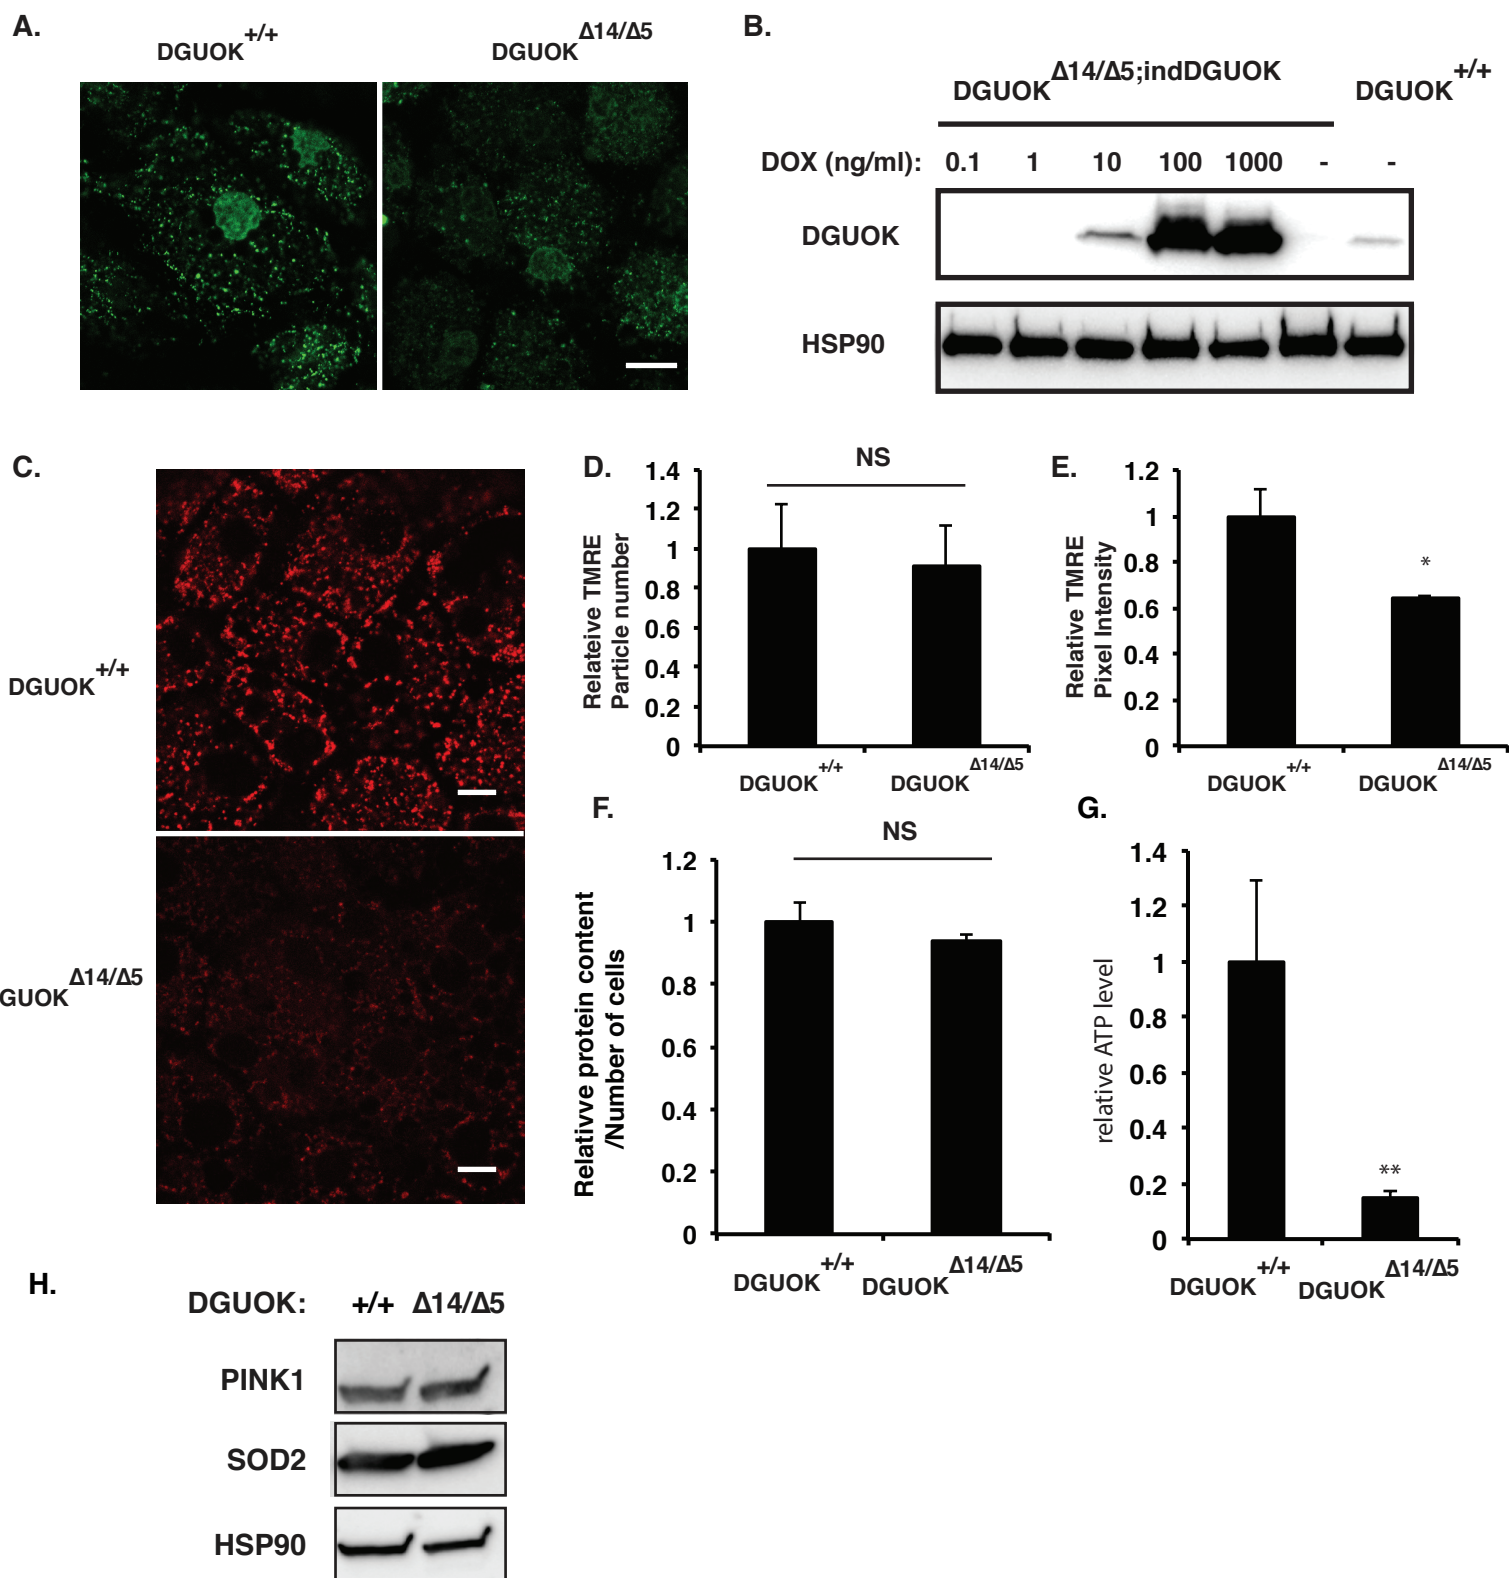

**Fig. S2. Related to Figure 3. DGUOK deficiency results in mitochondria dysfunction in iPSC derived hepatocytes**

A) SYBR green I (1:100,000 dilution) staining of mtDNA in wildtype and DGUOK $\Delta$ 14/ $\Delta$ 5 iPSC-derived hepatocytes (day 20). Scale bar=10 $\mu$ M. B) Immunoblot showing DGUOK protein levels in DGUOK $\Delta$ 14/ $\Delta$ 5,indDGUOK cells treated with different concentrations of Doxycycline (DOX). HSP90 was used as a loading control. C) TMRE staining in wildtype and DGUOK $\Delta$ 14/ $\Delta$ 5 iPSC derived hepatocytes. Scale bar=10 $\mu$ m. D - G) Bar charts showing particle number (D) and pixel intensity (E) of TMRE staining, protein content (F) per cell of control and DGUOK deficient hepatocytes normalized to cell number, and (G) cellular ATP content in control and DGUOK deficient hepatocytes cultured in galactose for 24 hrs, N=4 biological replicates; \* p =  $\leq$ 0.05, \*\* p $\leq$ 0.01. H) Immunoblot detecting the level of a characteristic mitophagy marker (PINK1) and mitochondrial ROS scavenger (SOD2) in control and DGUOK-deficient hepatocytes. HSP90 was used as a loading control.

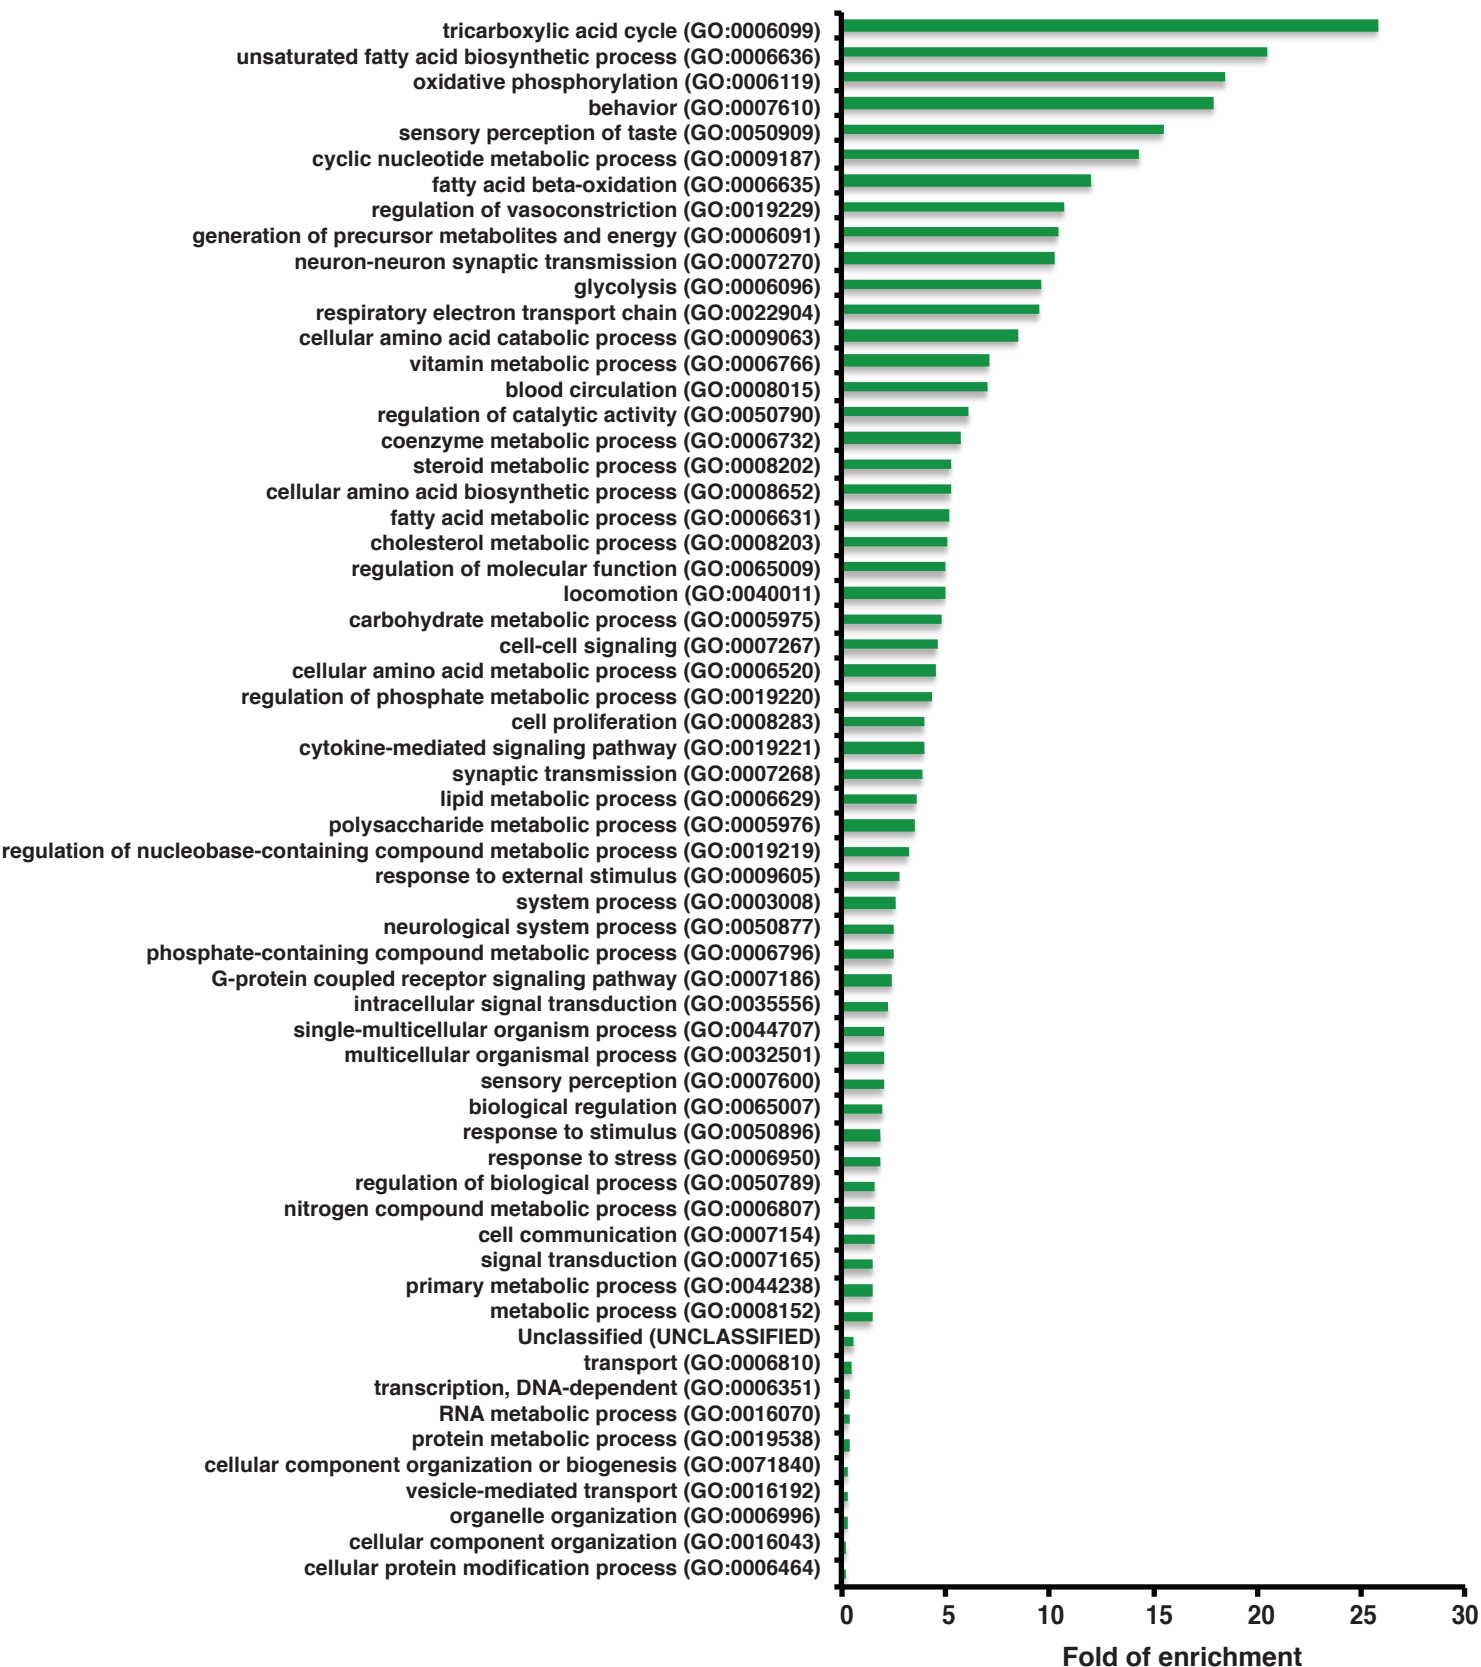

**Fig. S3.** Related to Figure 4. GO analysis of proteins targeted by the 34 drugs found to increase ATP production in DGUOK deficient iPSC-derived hepatocyte-like cells. Bar graph showing the fold over representation of biological processes involving proteins targeted by the drugs.

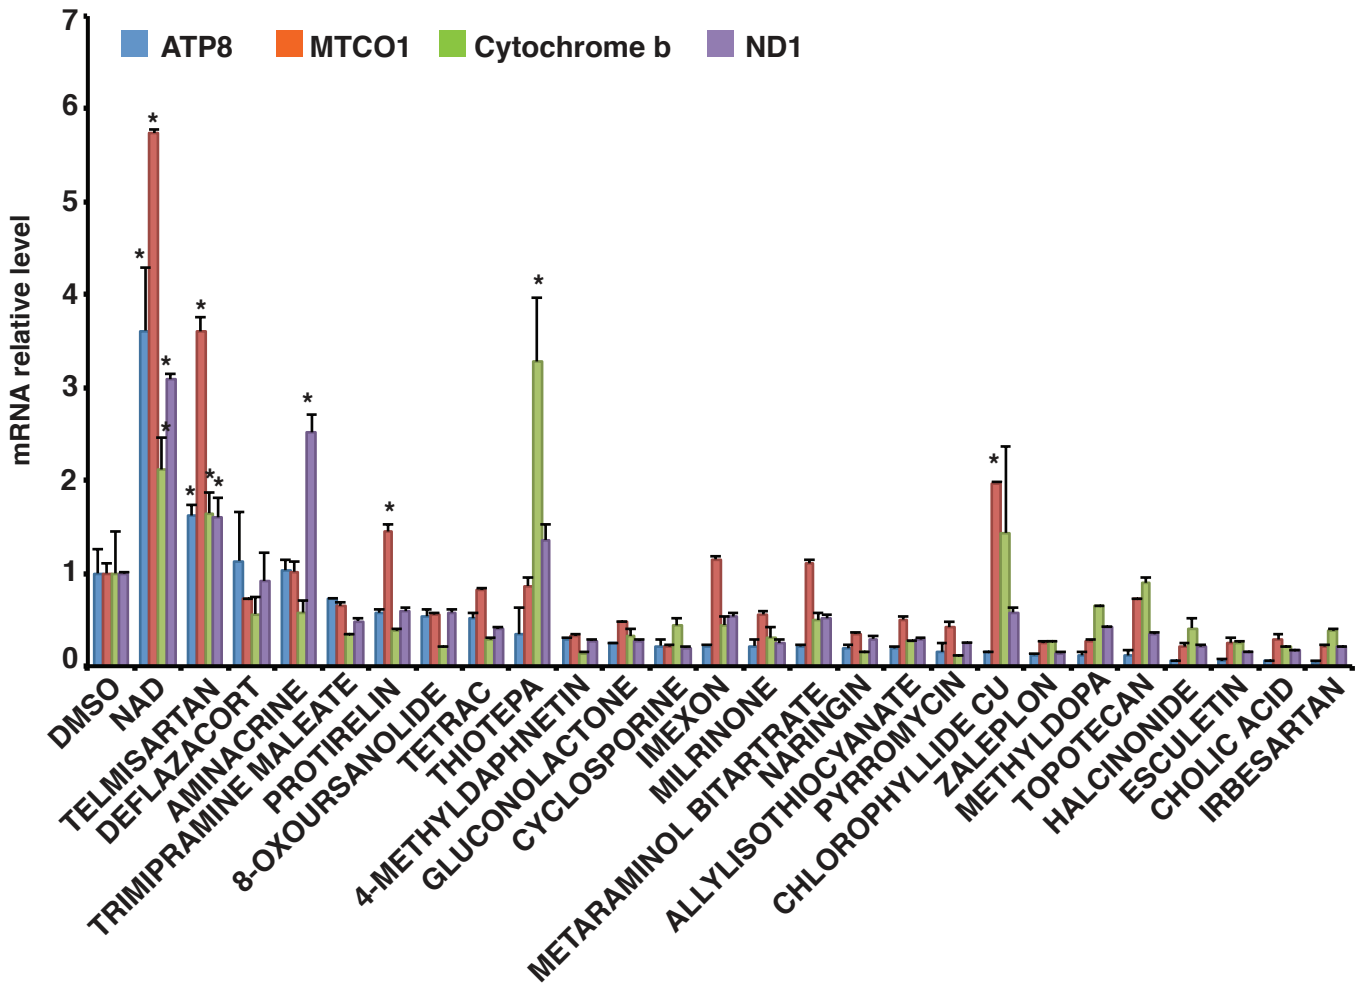

**Fig. S4. Related to Figure 4. Expression of ETC genes in DGUOK deficient iPSC-derived hepatocyte-like cells treated with drugs.** Bar graph showing fold change in the steady-state mRNA levels of mitochondrial ETC genes in DGUOK<sup>Δ14/Δ5</sup> iPSC-derived hepatocytes treated with vehicle (DMSO) or hits. (mean±SEM, N=3, \*p<0.05)

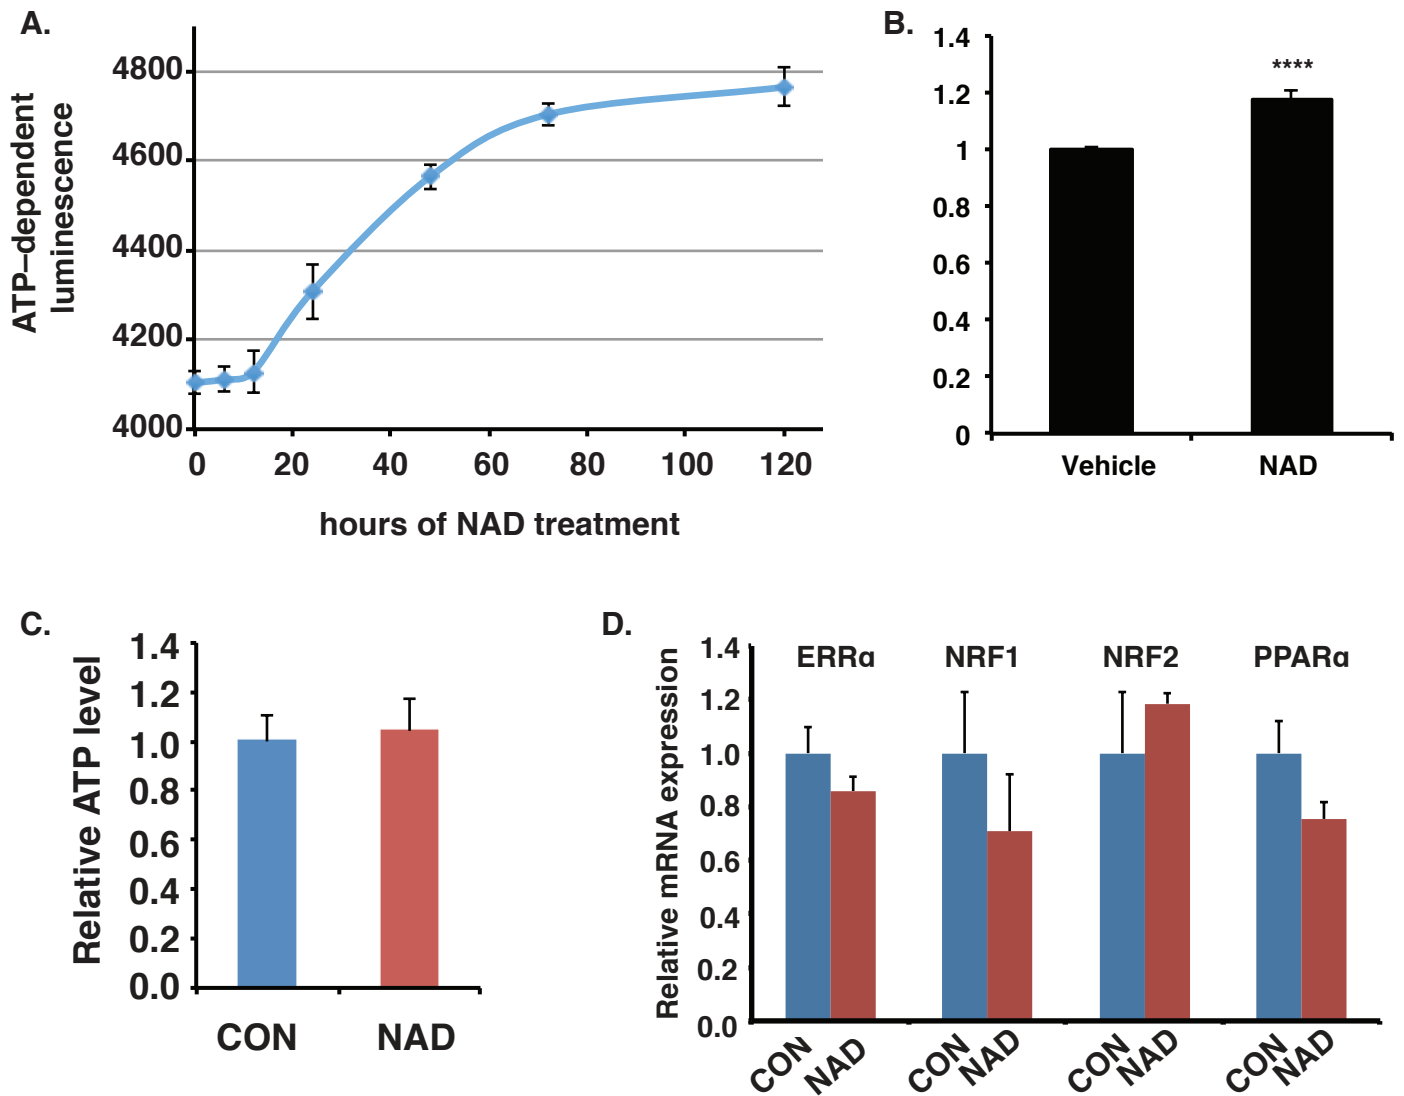

**Fig. S5. Related to Figures 5 and 6. Response of hepatocyte-like cells to NAD treatment.**

A) Graph showing impact of NAD on ATP production over time. DGUOK-deficient hepatocytes treated with 5μM NAD for 0, 6, 12, 24, 48, 72, and 120 hours before ATP levels were detected by luminescence assay at Day 20. (n=8, mean ± SEM). B) DGUOK-deficient hepatocyte-like cells were treated with vehicle (DMSO) or 5uM NAD for 5 days before measuring ATP levels luminescence assay at day 25. (n=8, mean ± SEM, \*\*\*\* p<0.0001). C) Bar graph showing ATP levels in control and NAD treated (5uM) wild type iPSC-derived hepatocyte-like cells. B) Bar graph showing relative steady-state mRNA levels of PGC1α targets (ERRα, PPARα, NRF1, and NRF2) in control and NAD treated wild type iPSC-derived hepatocyte-like cells .

**Table S2. Related to STAR methods. Primers used for PCR amplifications**

| Gene                          | Forward 5'-3'                     | Probe 5'-3'                                          | Reverse 5'-3'                 |
|-------------------------------|-----------------------------------|------------------------------------------------------|-------------------------------|
| <b>TaqMan PCR primers</b>     |                                   |                                                      |                               |
| HNF4A                         | TGG ACA AAG<br>ACA AGA GGA<br>ACC | 56-<br>FAM/TCTGGACGG/ZEN/CCTCC<br>TTCTTCATGC/3IABkFQ | ATA GCT TGA CCT TCG AGT<br>GC |
| RPL13A                        | GGCCACACTGT<br>TGATGACA           | 56-<br>FAM/TTGCACAAA/ZEN/GCCTC<br>AACACCTCC/3IABkFQ  | CCATAATCCCAGCAATCTC<br>A      |
| CYP3A4                        | ACCAGTGGAAA<br>ACTCAAGGAG         | TGATCACATCCATGCTGTAGG                                | TTGGTGAGAAATCTGAGGC<br>GGGAAG |
| ASGR1                         | TCCTTTCTGAG<br>CCATTGCC           | CGTGAAGCAGTTCGTGTCTGA<br>CCT                         | TGAAGTCGCTAGAGTCCCA<br>G      |
| <b>SYBR green PCR primers</b> |                                   |                                                      |                               |
| RPL13A                        | CTCAAGGTGTT<br>TGACGGCATCC        |                                                      | TACTTCCAGCCAACCTCGT<br>GAG    |
| APOB                          | AGAGGACAGAG<br>CCTGGTGGAT         |                                                      | CTGGACAAGGTCATACTCT<br>GCC    |
| HSP90                         | GGATGACAGCG<br>GTAAGGATAAG        |                                                      | GAGCCCGACGAGGAATAAA<br>TAG    |
| MCAD                          | ACAGGGGTTCA<br>GACTGCTATT         |                                                      | TCCTCCGTTGGTTATCCACA<br>T     |
| VLCAD                         | TCAGAGCATCG<br>GTTTCAAAGG         |                                                      | AGGGCTCGGTTAGACAGAA<br>AG     |
| ACOX1                         | GAGGTCCACGA<br>ATCTTACAAGC<br>A   |                                                      | TTGCACACAGGCGCTTTCT           |
| CPT1A                         | TCCAGTTGGCT<br>TATCGTGGTG         |                                                      | CTAACGAGGGGTCGATCTT<br>GG     |
| OGDH                          | AGATCATCCGT<br>CGGCTGGAGAT<br>GG  |                                                      | CTTCTCAGAGGACCACTTC<br>CGCTG  |
| CS                            | CAACTCAGGAC<br>GGTTGTTCCA<br>GG   |                                                      | GTAGTAATTCATCTCCGTCA<br>TGCC  |
| IDH3A                         | ACATCCTTAGT<br>GACTTGTGTGC<br>AG  |                                                      | GCATTGCCTCCCAAATCTTT<br>TGTC  |
| IDH3B                         | GATGTGCTTGT<br>GATGCCCAATC<br>TC  |                                                      | GTGATACTCAAGATTAAGAT<br>GCCG  |
| NRF1                          | AGCAAAAGCAG<br>AGGGTTTCA          |                                                      | CTGTGTTTGCGTTTGTGAT           |
| NRF2                          | GAGAGCCCAGT<br>CTTCATTGC          |                                                      | TGCTCAATGTCCTGTTGCAT          |

|                 |                                   |  |                                 |
|-----------------|-----------------------------------|--|---------------------------------|
| PPAR $\alpha$   | CAGAACAAGGA<br>GGCGGAGGTC         |  | TTCAGGTCCAAGTTTGCGA<br>AGC      |
| ERR $\alpha$    | CCTCTGTGACC<br>TCTTTGACC          |  | TACTGACATCTGGTCAGAC<br>A        |
| TFAM            | CCGAGGTGGTT<br>TTCATCTGT          |  | GCATCTGGGTTCTGAGCTT<br>T        |
| TFB1M           | ATGGCTCAGTA<br>CCTCTGCAATG        |  | TGGGCTGTATCAAGGGAGT<br>GA       |
| TFB2M           | ATCCCGGAAAT<br>CCAGACTTGT         |  | GACCAAGGCTCCATGTGCA             |
| ND1             | ATGGCCAACCT<br>CCTACTCCTCA<br>TT  |  | TTATGGCGTCAGCGAAGGG<br>TTGTA    |
| COX1            | ACCCTAGACCA<br>AACCTACGCCA<br>AA  |  | TAGGCCGAGAAAAGTGTGTTGT<br>GGGAA |
| CYTB            | AGTCCCACCCT<br>CACACGATTCT<br>TT  |  | AGTAAGCCGAGGGCGTCTT<br>TGATT    |
| ATP8            | ACCGTATGGCC<br>CACCATAATTAC<br>C  |  | TTTATGGGCTTTGGTGAGG<br>GAGGT    |
| mt-tRNA-<br>Leu | CACCCAAGAAC<br>AGGGTTTGT          |  | TGGCCATGGGTATGTTGTT<br>A        |
| B2G             | TGCTGTCTCCA<br>TGTTTGATGTAT<br>CT |  | TCTCTGCTCCCCACCTCTAA<br>GT      |
